# Supplementary material for: Development of Machine Learning Models to Predict Platinum Sensitivity of High-Grade Serous Ovarian Carcinoma
Source: PubMed Central journal article supplement (PMC8070756; doi:10.3390/cancers13081875), 2021-04-14
Supplement: cancers-13-01875-s001.pdf [file cancers-13-01875-s001.pdf]

# Development of Machine Learning Models to Predict Platinum Sensitivity of High-Grade Serous Ovarian Carcinoma

Suhyun Hwangbo, Se Ik Kim, Ju-Hyun Kim, Kyung Jin Eoh, Chanhee Lee, Young Tae Kim, Dae-Shik Suh, Taesung Park and Yong Sang Song

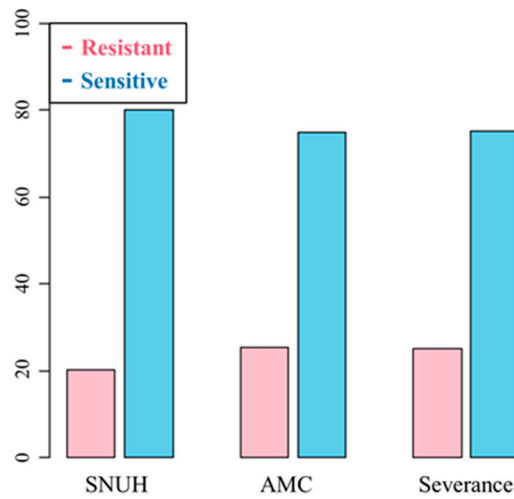

Figure S1. Distribution of platinum-sensitive and -resistant patients by each institution.

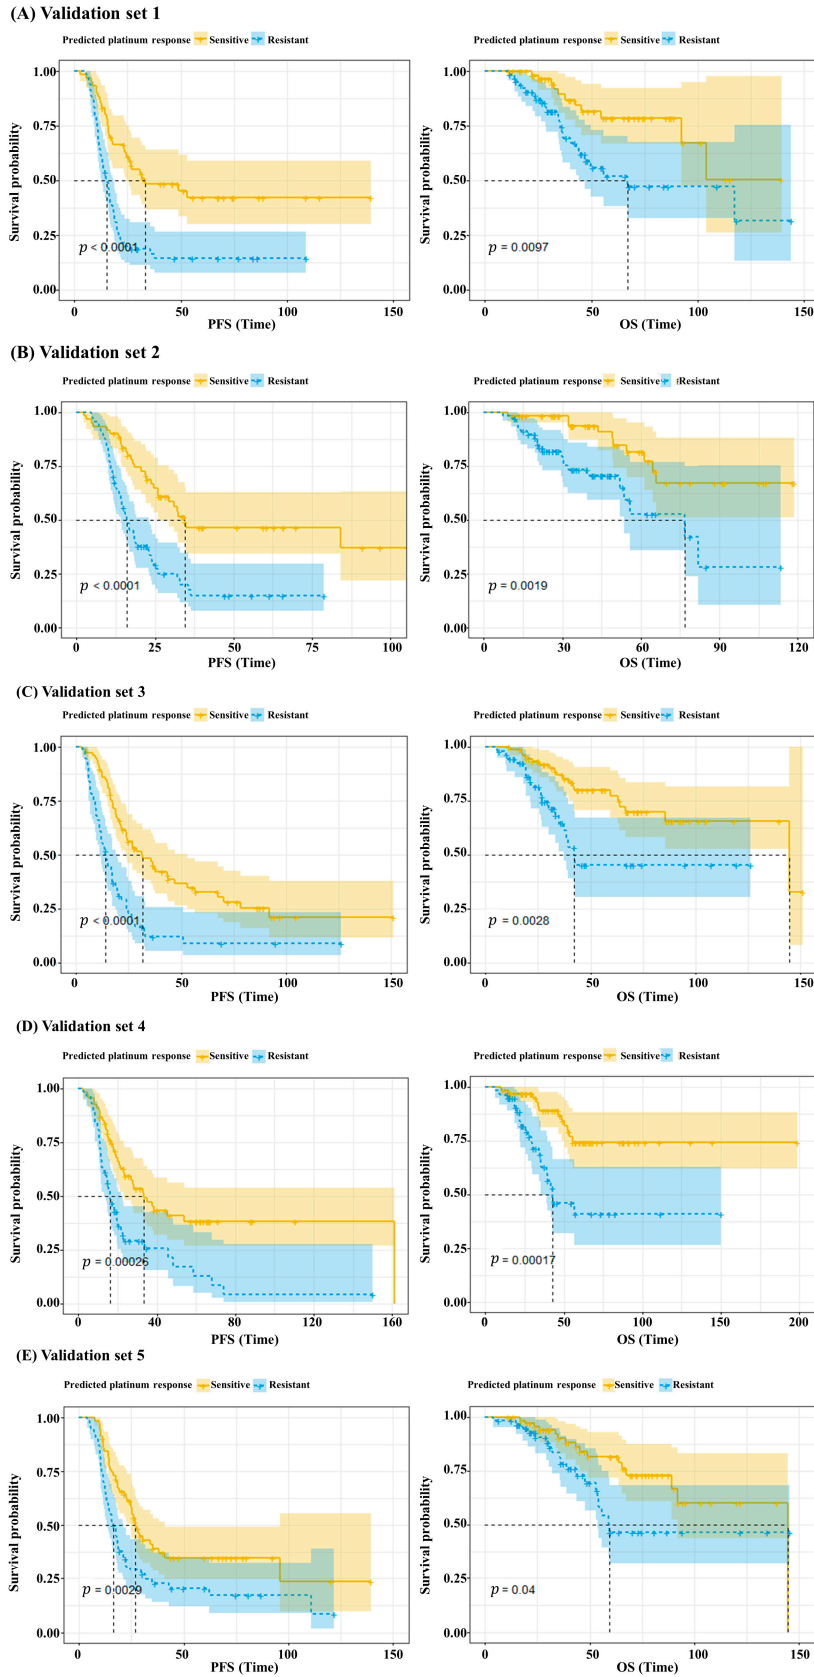

**Figure S2.** Comparisons of survival outcomes between the platinum-sensitive and -resistant groups predicted by the six-variable, LR model using the cut-off value of 0.175 in each validation set. Left, progress-free survival; Right, overall survival. (A–E) represent the results for the five validation sets.

**Table S1.** Independent variables used in the analysis.

| Domain                                 | No. of Variables | List                                                                                                                                                                                                                                                                                                                                                                                                                                                                                                                                     |
|----------------------------------------|------------------|------------------------------------------------------------------------------------------------------------------------------------------------------------------------------------------------------------------------------------------------------------------------------------------------------------------------------------------------------------------------------------------------------------------------------------------------------------------------------------------------------------------------------------------|
| Basic information                      | 3                | Age, Parity, Menopausal state                                                                                                                                                                                                                                                                                                                                                                                                                                                                                                            |
| Co-morbidities                         | 3                | Hypertension, Diabetes, Dyslipidemia                                                                                                                                                                                                                                                                                                                                                                                                                                                                                                     |
| Personal and family history of cancers | 5                | Personal history of breast cancer, Familial history of breast cancer *, No. of family members with breast cancer*, Family history of gynecologic cancer *, No. of family members with gynecologic cancer*                                                                                                                                                                                                                                                                                                                                |
| Biometry                               | 3                | Height, Body weight, BMI                                                                                                                                                                                                                                                                                                                                                                                                                                                                                                                 |
| Tumor marker                           | 1                | Serum CA-125 levels at diagnosis                                                                                                                                                                                                                                                                                                                                                                                                                                                                                                         |
| Laboratory tests                       | 1                | Hemoglobin                                                                                                                                                                                                                                                                                                                                                                                                                                                                                                                               |
| Staging and pathology                  | 5                | Origin, FIGO stage, Pelvic LN status, Para-aortic LN status, Pleural effusion                                                                                                                                                                                                                                                                                                                                                                                                                                                            |
| Neoadjuvant chemotherapy               | 2                | NAC, Cycle of NAC                                                                                                                                                                                                                                                                                                                                                                                                                                                                                                                        |
| Surgical findings and procedure        | 17               | LN dissection, No. of harvested LNs, No. of positive LNs, Large bowel resection, Upper abdominal surgery, Involvement of pelvic tissue other than uterus and tube, Involvement of bladder or rectal mucosa, Involvement of small bowel and mesentery, Involvement of colon other than rectosigmoid, Involvement of liver surface, Involvement of diaphragm, Involvement of spleen, Liver parenchyma metastasis, Involvement of other abdominal tissue, Lung metastasis, Supraclavicular LN metastasis, Residual tumor size after PDS/IDS |
| Frontline chemotherapy                 | 2                | Total cycles of frontline chemotherapy, Frontline chemotherapy regimen                                                                                                                                                                                                                                                                                                                                                                                                                                                                   |

Detailed information on the type of collected variables was the same as our previous study [1] except for differential blood cell counts at initial diagnosis, which were not collected in this study. Abbreviations: BMI, body mass index; CA-125, cancer antigen 125; FIGO, International Federation of Gynecology and Obstetrics; IDS, interval debulking surgery; LN, lymph node; NAC, neoadjuvant chemotherapy; PDS, primary debulking surgery. \*Up to 2nd degree. Reference: 1. Kim, S.I.; Song, M.; Hwangbo, S.; Lee, S.; Cho, U.; Kim J.H.; Lee, M.; Kim, H.S.; Chung, H.H.; Suh, D.S.; et al. Development of Web-Based Nomograms to Predict Treatment Response and Prognosis of Epithelial Ovarian Cancer. *Cancer Res. Treat.* **2019**, *51*, 1144–1155.

**Table S2.** List of machine learning methods used in this study.

| Method                 | Package      | Version |
|------------------------|--------------|---------|
| Random forest          | randomForest | 4.6–14  |
| Support Vector Machine | e1071        | 1.7–4   |
|                        | keras        | 2.4.3   |
| Deep Neural Network    | scikit-learn | 0.23.1  |
|                        | tensorflow   | 2.3.0   |

**Table S3.** Surgical procedures and findings.

| Characteristics                                | Missing Rate (%) | All (n = 1002, %) | Platinum-Sensitive (n = 779, %) | Platinum-Resistant (n = 223, %) | p      |
|------------------------------------------------|------------------|-------------------|---------------------------------|---------------------------------|--------|
| <b>Surgical procedures</b>                     |                  |                   |                                 |                                 |        |
| LN dissection                                  | 4.3              | 835 (87.1)        | 652 (88.1)                      | 183 (83.6)                      | 0.100  |
| No. of harvested LNs                           | 1.0              | 27.5 ± 20         | 28 ± 21                         | 25.8 ± 19                       | 0.138  |
| No. of positive LNs                            | 12.8             | 6.2 ± 11          | 5.7 ± 10                        | 8.4 ± 11                        | 0.003  |
| Large bowel resection                          | 6.2              | 320 (34)          | 238 (32.7)                      | 82 (38.7)                       | 0.124  |
| Upper abdominal surgery                        | 6.8              | 291 (31.2)        | 215 (29.7)                      | 76 (36.4)                       | 0.078  |
| <b>Surgical findings and tumor involvement</b> |                  |                   |                                 |                                 |        |
| Pelvic LN metastasis                           | 16.7             | 437 (52.3)        | 310 (47.5)                      | 127 (69.8)                      | <0.001 |
| Para-aortic LN metastasis                      | 24.2             | 396 (52.1)        | 294 (49.2)                      | 102 (63.0)                      | 0.002  |
| Pelvic tissue other than uterus and tube       | 20.5             |                   |                                 |                                 | 0.102  |
| No                                             |                  | 224 (28.1)        | 186 (29.9)                      | 38 (21.8)                       |        |
| Microscopic                                    |                  | 53 (6.6)          | 39 (6.3)                        | 14 (8.0)                        |        |
| Macroscopic                                    |                  | 520 (65.2)        | 398 (63.9)                      | 122 (70.1)                      |        |
| Bladder or rectal mucosa                       | 18.9             | 95 (11.7)         | 70 (11.0)                       | 25 (14.0)                       | 0.345  |
| Small bowel and mesentery                      | 20.4             |                   |                                 |                                 | <0.001 |
| No + Microscopic                               |                  | 481 (60.3)        | 405 (64.8)                      | 76 (43.9)                       |        |
| Macroscopic, ≤2 cm                             |                  | 264 (33.1)        | 180 (28.8)                      | 84 (48.6)                       |        |
| Macroscopic, >2 cm                             |                  | 53 (6.6)          | 40 (6.4)                        | 13 (7.5)                        |        |
| Colon other than rectosigmoid                  | 20.1             |                   |                                 |                                 | 0.038  |
| No + Microscopic                               |                  | 509 (63.5)        | 413 (65.8)                      | 96 (55.5)                       |        |
| Macroscopic, ≤2 cm                             |                  | 159 (19.9)        | 115 (18.3)                      | 44 (25.4)                       |        |
| Macroscopic, >2 cm                             |                  | 133 (16.6)        | 100 (15.9)                      | 33 (19.1)                       |        |
| Diaphragm                                      | 19.9             |                   |                                 |                                 | <0.001 |
| No + Microscopic                               |                  | 467 (58.2)        | 384 (61.3)                      | 83 (46.9)                       |        |
| Macroscopic, ≤2 cm                             |                  | 264 (32.9)        | 184 (29.4)                      | 80 (45.2)                       |        |
| Macroscopic, >2 cm                             |                  | 72 (9.0)          | 58 (9.3)                        | 14 (7.9)                        |        |
| Liver surface                                  | 20.2             |                   |                                 |                                 | 0.051  |
| No + Microscopic                               |                  | 630 (78.8)        | 504 (80.5)                      | 126 (72.4)                      |        |
| Macroscopic, ≤2 cm                             |                  | 127 (15.9)        | 93 (14.9)                       | 34 (19.5)                       |        |
| Macroscopic, >2 cm                             |                  | 43 (5.4)          | 29 (4.6)                        | 14 (8.0)                        |        |
| Liver parenchyma metastasis                    | 5.1              | 40 (4.2)          | 25 (3.3)                        | 15 (7.4)                        | 0.019  |
| Spleen capsule                                 | 19.5             |                   |                                 |                                 | 0.063  |
| No + Microscopic                               |                  | 720 (89.2)        | 570 (90.5)                      | 150 (85.2)                      |        |
| Macroscopic, ≤2 cm                             |                  | 46 (5.7)          | 30 (4.8)                        | 16 (9.0)                        |        |
| Macroscopic, >2 cm                             |                  | 41 (5.1)          | 30 (4.8)                        | 11 (6.2)                        |        |
| Spleen parenchyma metastasis                   | 19.5             | 18 (2.2)          | 15 (2.4)                        | 3 (1.7)                         | 0.796  |
| Other abdominal tissue                         | 19.4             |                   |                                 |                                 | 0.229  |
| No + Microscopic                               |                  | 443 (54.8)        | 356 (56.4)                      | 87 (49.2)                       |        |
| Macroscopic, ≤2cm                              |                  | 263 (32.5)        | 198 (31.4)                      | 65 (36.7)                       |        |
| Macroscopic, >2cm                              |                  | 102 (12.6)        | 77 (12.2)                       | 25 (14.1)                       |        |
| Lung metastasis                                | 5.2              | 19 (2.0)          | 16 (2.1)                        | 3 (1.5)                         | 0.760  |
| Supraclavicular LN metastasis                  | 1.9              | 74 (7.5)          | 51 (6.6)                        | 23 (10.7)                       | 0.065  |
| Pleural effusion                               | 5.7              | 107 (11.3)        | 70 (9.4)                        | 37 (18.2)                       | <0.001 |

Data are presented as mean ± standard deviation for continuous or number (%) for categorical variables. Detailed information on the type of collected variables was the same as our previous study [1] except for differential blood cell counts at initial diagnosis, which were not collected in this study. Abbreviations: LN, lymph node. Reference: 1. Kim, S.I.; Song, M.; Hwangbo, S.; Lee, S.; Cho, U.; Kim J.H.; Lee, M.; Kim, H.S.; Chung, H.H.; Suh, D.S.; et al. Development of Web-Based Nomograms to Predict Treatment Response and Prognosis of Epithelial Ovarian Cancer. *Cancer Res. Treat.* **2019**, *51*, 1144–1155.

**Table S4.** Fitted results of the logistic regression model used for nomogram development.

| Variable                                                | Estimate | SE    | <i>p</i> |
|---------------------------------------------------------|----------|-------|----------|
| (Intercept)                                             | −5.693   | 0.820 | <0.001   |
| Age                                                     | 0.031    | 0.010 | 0.003    |
| Serum CA-125 levels (ln-transformed)                    | 0.213    | 0.077 | 0.006    |
| Primary treatment strategy                              |          |       |          |
| PDS                                                     | 1        |       |          |
| NAC                                                     | 1.039    | 0.220 | <0.001   |
| Pelvic LN status                                        |          |       |          |
| No metastasis                                           | 1        |       |          |
| Metastasis                                              | 0.823    | 0.228 | <0.001   |
| Involvement of pelvic tissue other than uterus and tube |          |       |          |
| No                                                      | 1        |       |          |
| Microscopic                                             | 0.444    | 0.451 | 0.324    |
| Macroscopic                                             | −0.166   | 0.256 | 0.517    |
| Involvement of small bowel and mesentery                |          |       |          |
| No + Microscopic                                        | 1        |       |          |
| Macroscopic, ≤2 cm                                      | 0.812    | 0.231 | <0.001   |
| Macroscopic, >2 cm                                      | 0.672    | 0.404 | 0.097    |

Abbreviations: CA-125, cancer antigen 125; LN, lymph node; NAC, neoadjuvant chemotherapy; PDS, primary debulking surgery; SE, standard error.

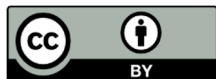

© 2021 by the authors. Licensee MDPI, Basel, Switzerland. This article is an open access article distributed under the terms and conditions of the Creative Commons Attribution (CC BY) license (<http://creativecommons.org/licenses/by/4.0/>).
